# Supplementary material for: Novel Bacteriophages Capable of Disrupting Biofilms From Clinical Strains of Aeromonas hydrophila
Source: PubMed Central journal article supplement (PMC7033617; doi:10.3389/fmicb.2020.00194), 2020-02-14
Supplement: Image_2.pdf [file Image_2.pdf]

**Title: Novel bacteriophages capable of disrupting biofilms from clinical strains of *Aeromonas hydrophila*.**

Mwila Kabwe<sup>1</sup>, Teagan Brown<sup>1</sup>, Lachlan Speirs<sup>1</sup>, Heng Ku<sup>1</sup>, Michael Leach<sup>2</sup>, Hiu Tat Chan<sup>3</sup>, Steve Petrovski<sup>4</sup>, Peter Lock<sup>5</sup>, Joseph Tucci<sup>1\*</sup>

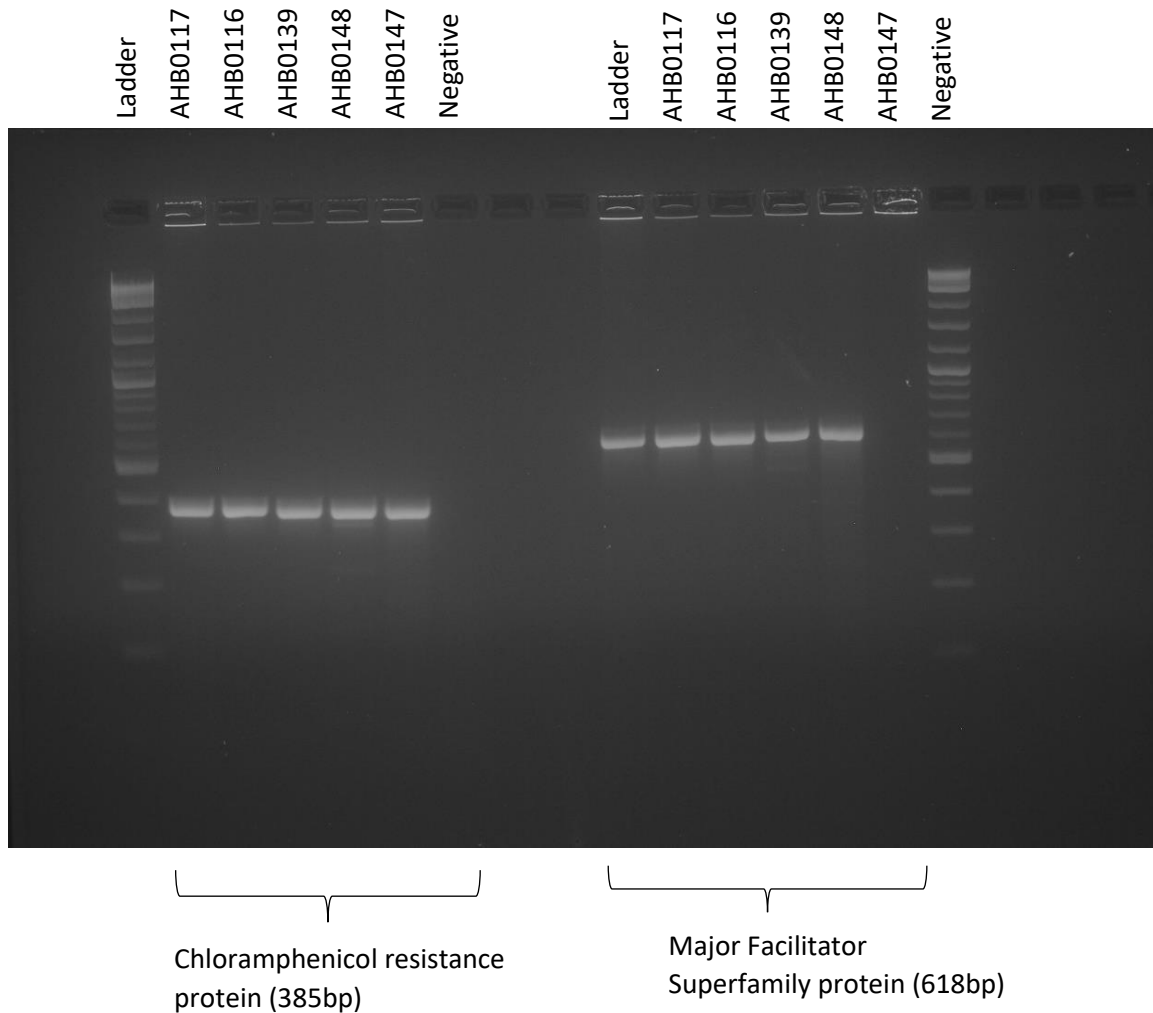

Figure S2: PCR detection of antibiotic resistance markers in clinical strains of *A. hydrophila* used in this study. The genes for chloramphenicol resistance protein and Major Facilitator Superfamily efflux pump proteins were detected in all strains.
